# Supplementary material for: National survey of China's oncologists' knowledge, attitudes, and clinical practice patterns on complementary and alternative medicine
Source: PubMed Central journal article supplement (PMC5355110; doi:10.18632/oncotarget.14560), 2017-01-09
Supplement: oncotarget-08-13440-s001.pdf [file oncotarget-08-13440-s001.pdf]

## National survey of China's oncologists' knowledge, attitudes, and clinical practice patterns on complementary and alternative medicine

### Supplementary Materials

**Supplementary Table 1: Univariable analysis of communication and practice patterns regarding CAM ( $n = 6,007$ )**

| Variable                                               | Initiate discussion about CAM use |            | Encourage CAM use for treatment |            | Support patients' use of CAM when no standard treatment options |            | Believe CAM treatment is effective for symptoms and treatment of cancer |            |
|--------------------------------------------------------|-----------------------------------|------------|---------------------------------|------------|-----------------------------------------------------------------|------------|-------------------------------------------------------------------------|------------|
|                                                        | Yes (%)                           | <i>P</i> * | Yes (%)                         | <i>P</i> * | Yes (%)                                                         | <i>P</i> * | Yes (%)                                                                 | <i>P</i> * |
| Age, years                                             |                                   | < 0.001    |                                 | < 0.001    |                                                                 | < 0.001    |                                                                         | < 0.001    |
| < 33                                                   | 2,019 (63.4)                      |            | 963 (30.2)                      |            | 2,126 (66.7)                                                    |            | 1,303 (40.9)                                                            |            |
| ≥ 33                                                   | 2,017 (71.5)                      |            | 1,195 (42.4)                    |            | 2,264 (80.3)                                                    |            | 1,397 (49.5)                                                            |            |
| Sex                                                    |                                   | 0.087      |                                 | 0.790      |                                                                 | 0.548      |                                                                         | 0.445      |
| Male                                                   | 3,008 (66.6)                      |            | 1,627 (36.0)                    |            | 3,310 (73.3)                                                    |            | 2,043 (45.2)                                                            |            |
| Female                                                 | 1,028 (69.0)                      |            | 531 (35.6)                      |            | 1,080 (72.5)                                                    |            | 657 (44.0)                                                              |            |
| Region                                                 |                                   | 0.946      |                                 | < 0.001    |                                                                 | 0.094      |                                                                         | 0.104      |
| Urban metropolises                                     | 665 (67.4)                        |            | 333 (33.7)                      |            | 709 (71.8)                                                      |            | 424 (43.0)                                                              |            |
| Provincial capitals                                    | 1,567 (67.4)                      |            | 765 (32.9)                      |            | 1,675 (72.0)                                                    |            | 1,026 (44.1)                                                            |            |
| Other cities                                           | 1,804 (67.0)                      |            | 1,060 (39.3)                    |            | 2,006 (74.5)                                                    |            | 1,250 (46.4)                                                            |            |
| Practice setting                                       |                                   | 0.002      |                                 | < 0.001    |                                                                 | < 0.001    |                                                                         | < 0.001    |
| Academic hospital                                      | 1,572 (64.9)                      |            | 689 (28.4)                      |            | 1,659 (68.4)                                                    |            | 982 (40.5)                                                              |            |
| General hospital                                       | 2,150 (68.3)                      |            | 1,237 (39.3)                    |            | 2,384 (75.7)                                                    |            | 1,469 (46.6)                                                            |            |
| Other hospital                                         | 314 (72.4)                        |            | 232 (53.5)                      |            | 347 (80.0)                                                      |            | 249 (57.4)                                                              |            |
| Working duration, years                                |                                   | < 0.001    |                                 | < 0.001    |                                                                 | < 0.001    |                                                                         | < 0.001    |
| < 6                                                    | 2,447 (65.4)                      |            | 1,225 (32.7)                    |            | 2,578 (68.9)                                                    |            | 1,573 (42.0)                                                            |            |
| ≥ 6                                                    | 1,589 (70.2)                      |            | 933 (41.2)                      |            | 1,812 (80.0)                                                    |            | 1,127 (49.8)                                                            |            |
| Type of medical license                                |                                   | < 0.001    |                                 | < 0.001    |                                                                 | < 0.001    |                                                                         | < 0.001    |
| Clinical medicine                                      | 3,179 (62.9)                      |            | 1,384 (27.4)                    |            | 3,512 (69.5)                                                    |            | 1,936 (38.3)                                                            |            |
| Traditional Chinese medicine                           | 857 (89.8)                        |            | 774 (81.1)                      |            | 878 (92.0)                                                      |            | 764 (80.1)                                                              |            |
| Have adequate knowledge to answer questions about CAM† |                                   | < 0.001    |                                 | < 0.001    |                                                                 | < 0.001    |                                                                         | < 0.001    |
| Yes                                                    | 1,070 (88.8)                      |            | 900 (74.7)                      |            | 1,104 (91.6)                                                    |            | 996 (82.7)                                                              |            |
| No                                                     | 2,966 (61.8)                      |            | 1,258 (26.2)                    |            | 3,286 (68.4)                                                    |            | 1,704 (35.5)                                                            |            |
| Receive professional education†                        |                                   | < 0.001    |                                 | < 0.001    |                                                                 | < 0.001    |                                                                         | < 0.001    |
| Yes                                                    | 1,168 (88.3)                      |            | 930 (70.3)                      |            | 1,173 (88.7)                                                    |            | 1,071 (81.0)                                                            |            |
| No                                                     | 2,868 (61.2)                      |            | 1,228 (26.2)                    |            | 3,217 (68.7)                                                    |            | 1,629 (34.8)                                                            |            |

CAM: complementary and alternative medicine.

\**P* was obtained from chi-square test.

†From Likert-scale type of statements: response of strongly agree or agree meant yes, response of undecided, disagree or strongly disagree meant no.
